# Supplementary material for: Identification of core miRNAs and regulatory pathways in breast cancer by integrated bioinformatics analysis
Source: Royal Society of Chemistry journal article supplement (doi:10.1039/d0mo00171f), 2021-01-06

# hsa-mir-139 Association Result

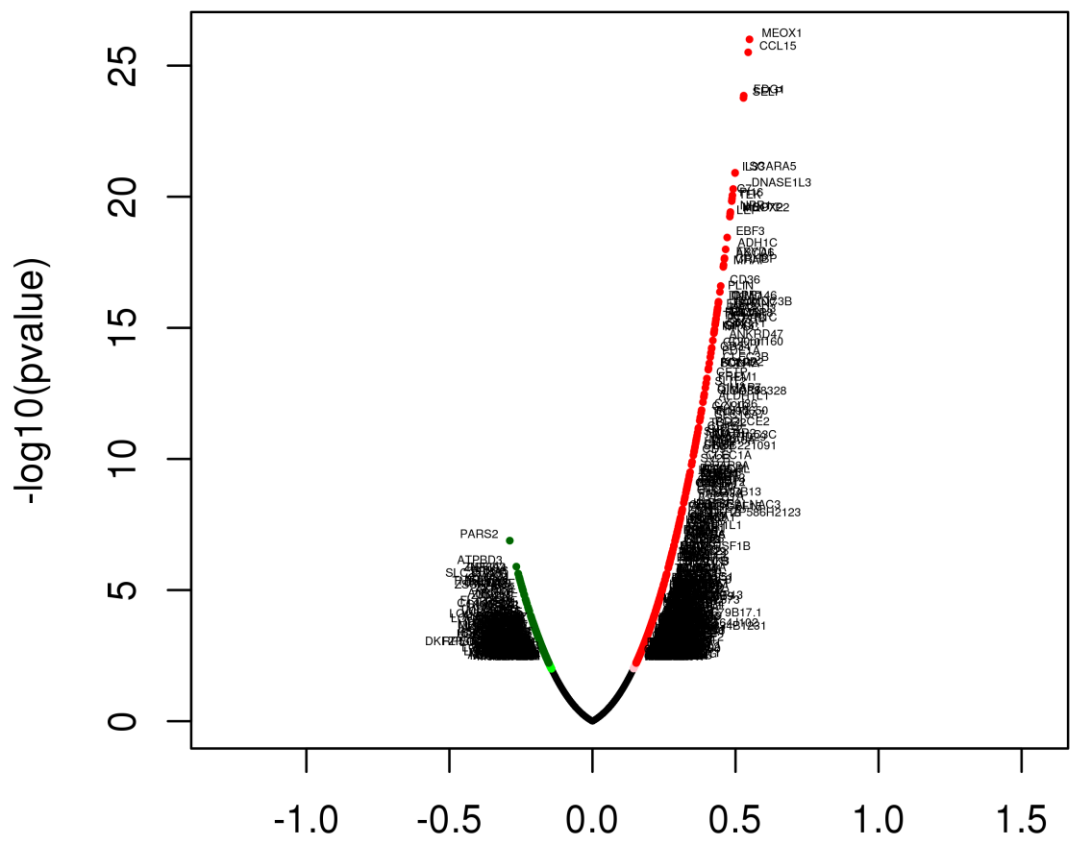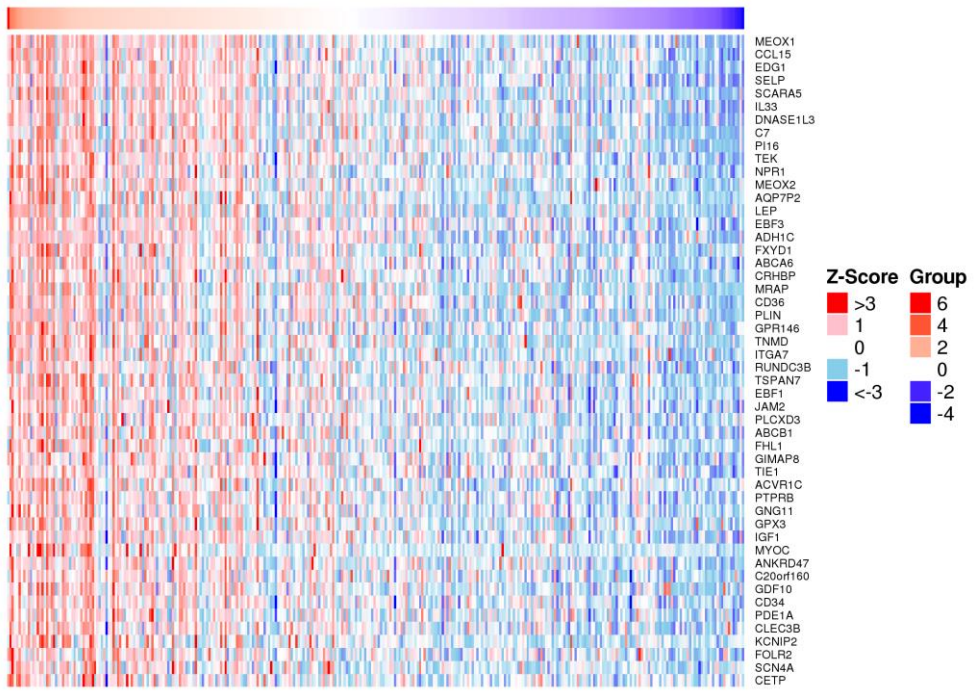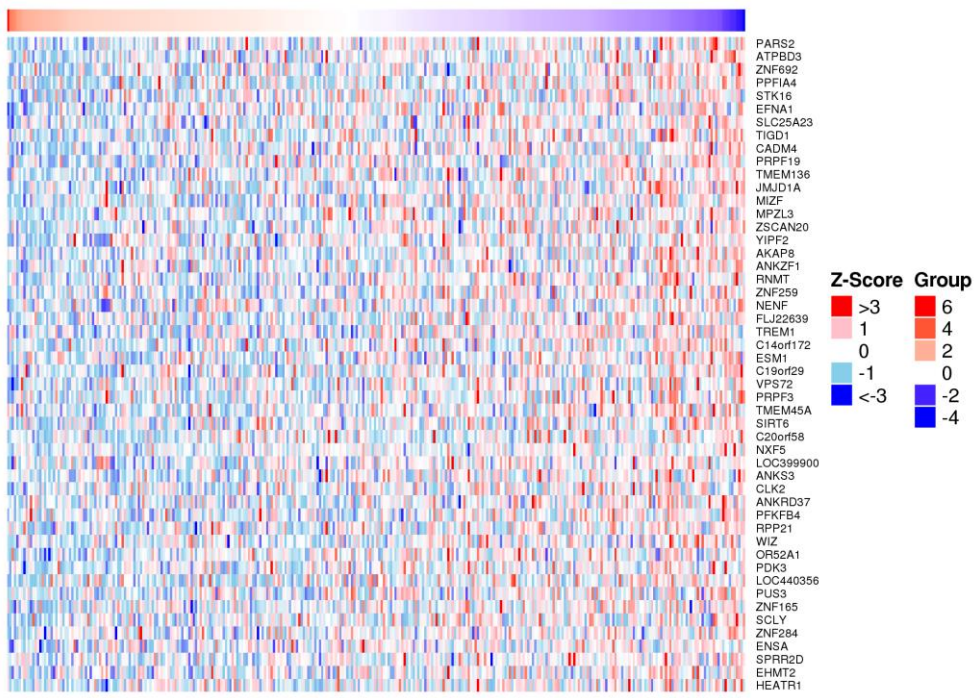



# hsa-mir-328 Association Result

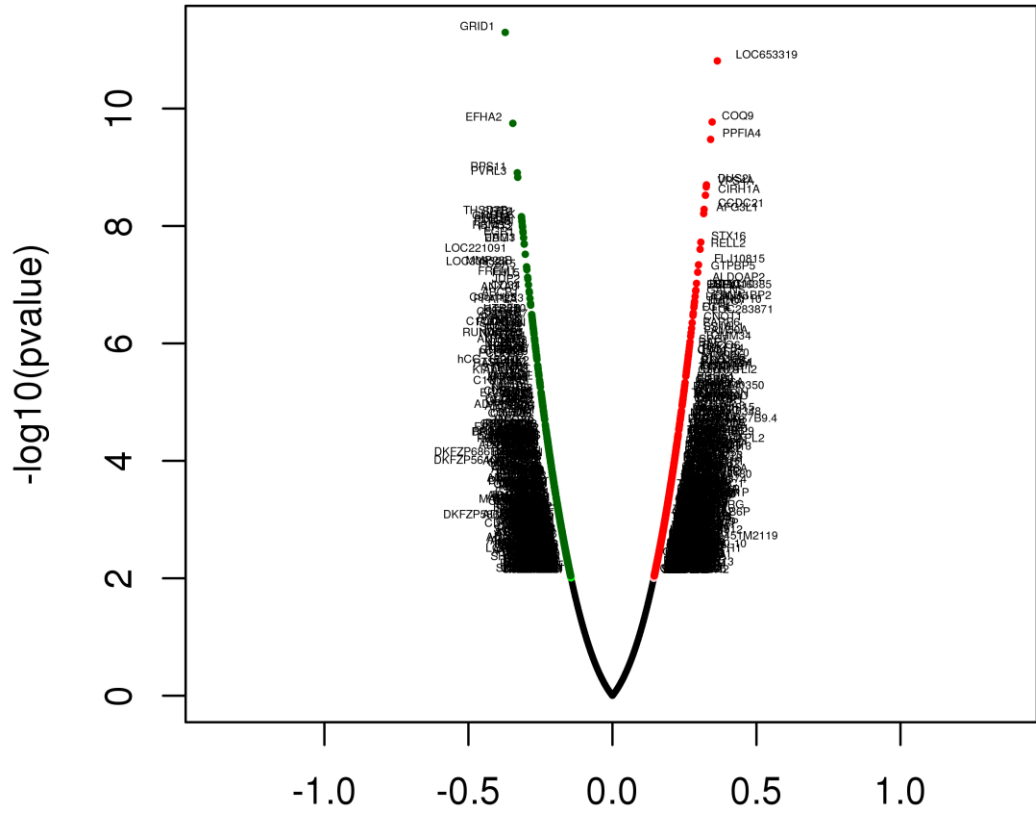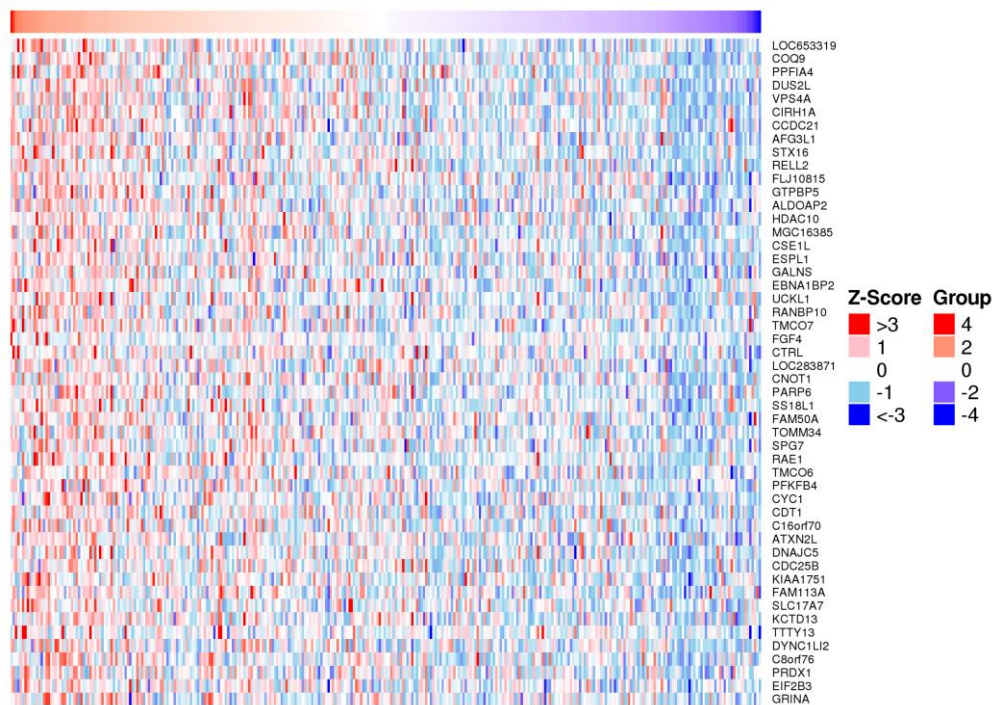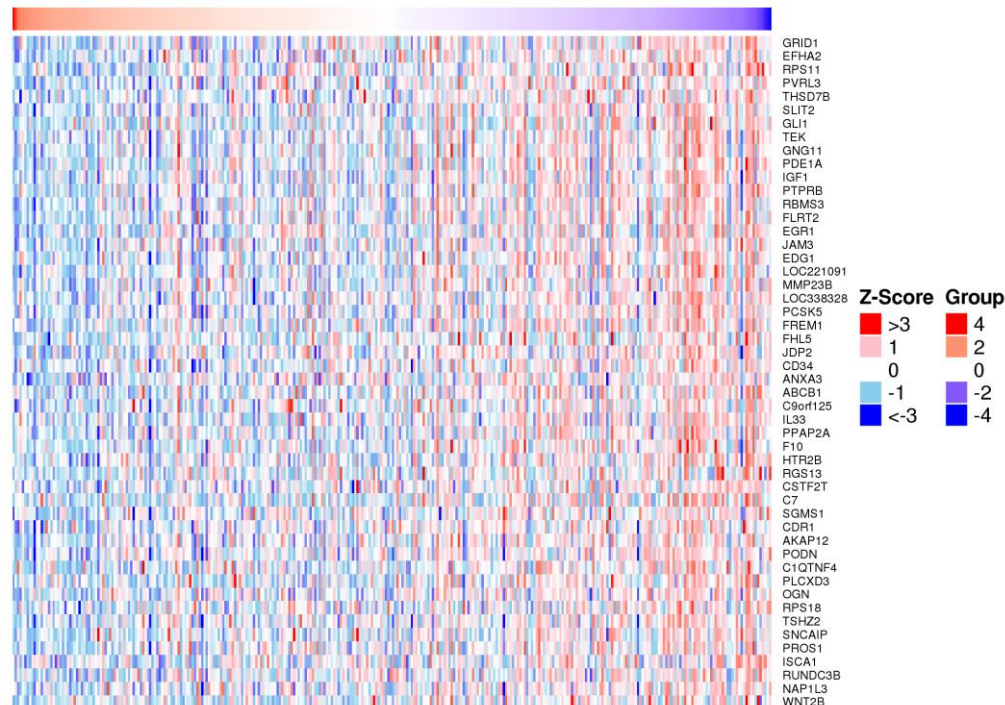



# hsa-mir-369 Association Result

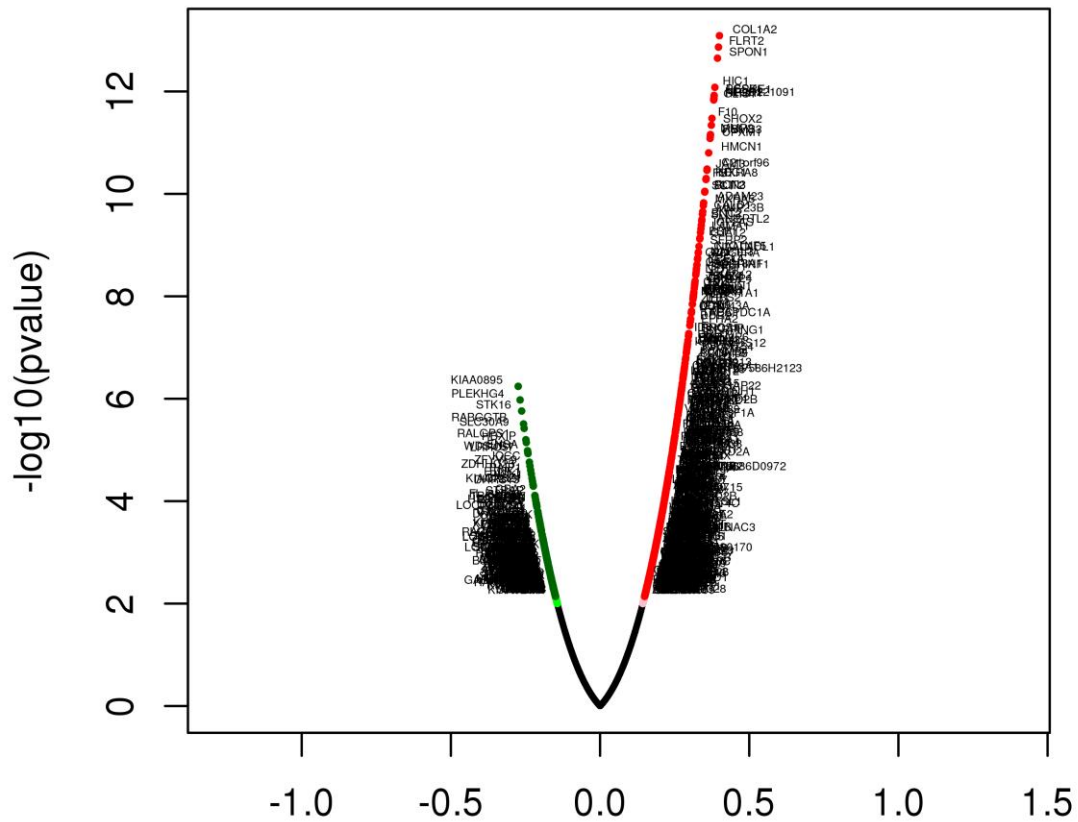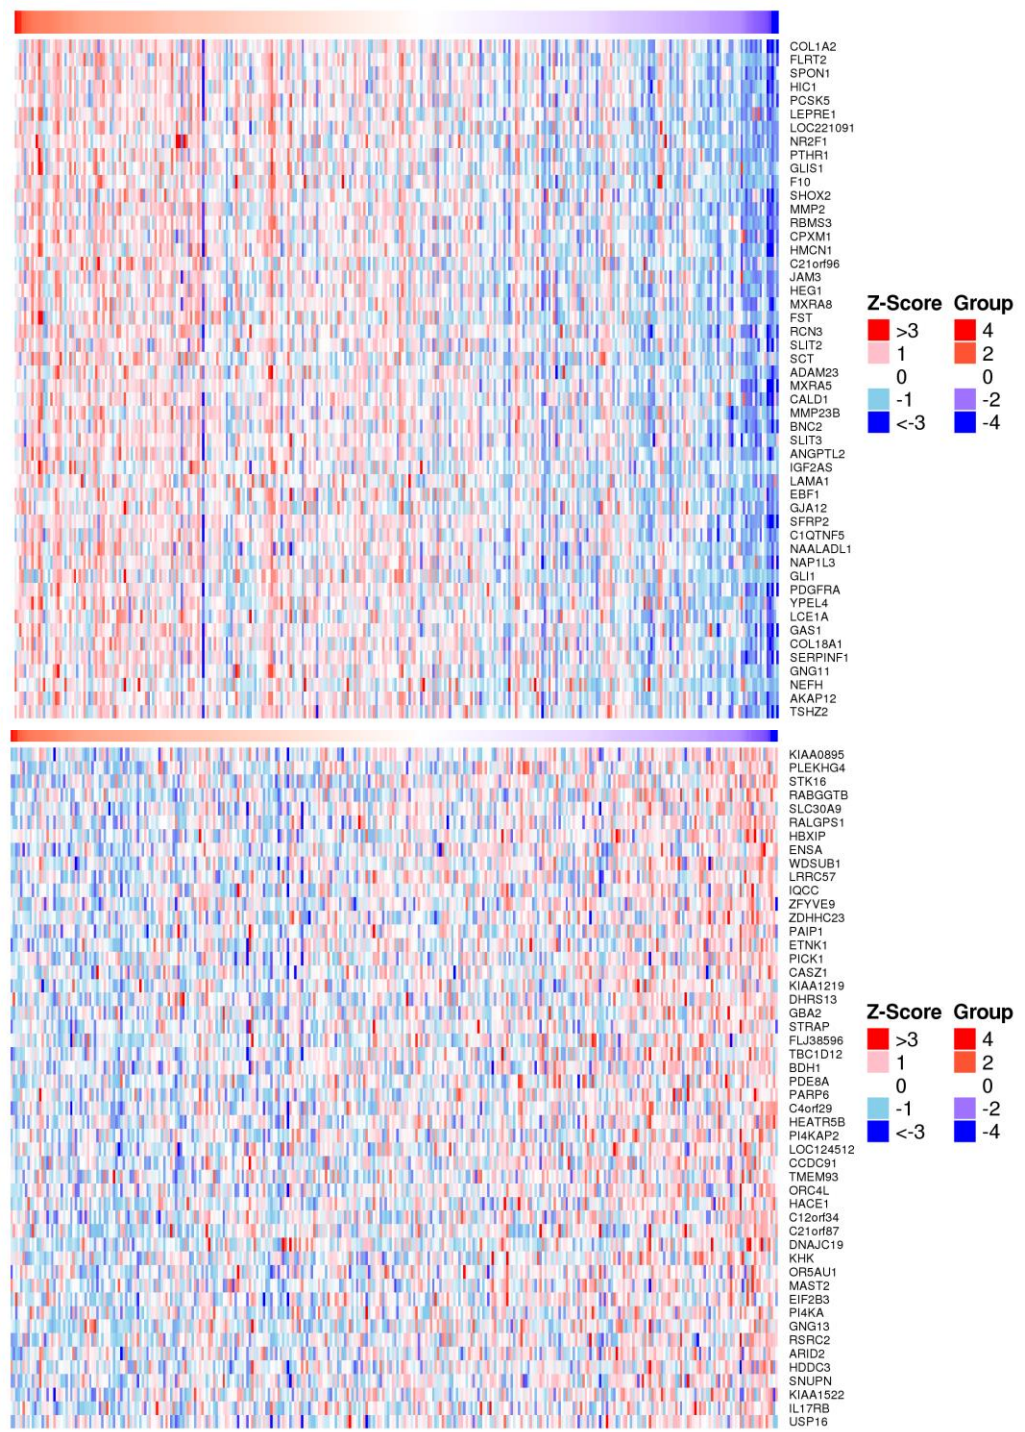



# hsa-mir-495 Association Result

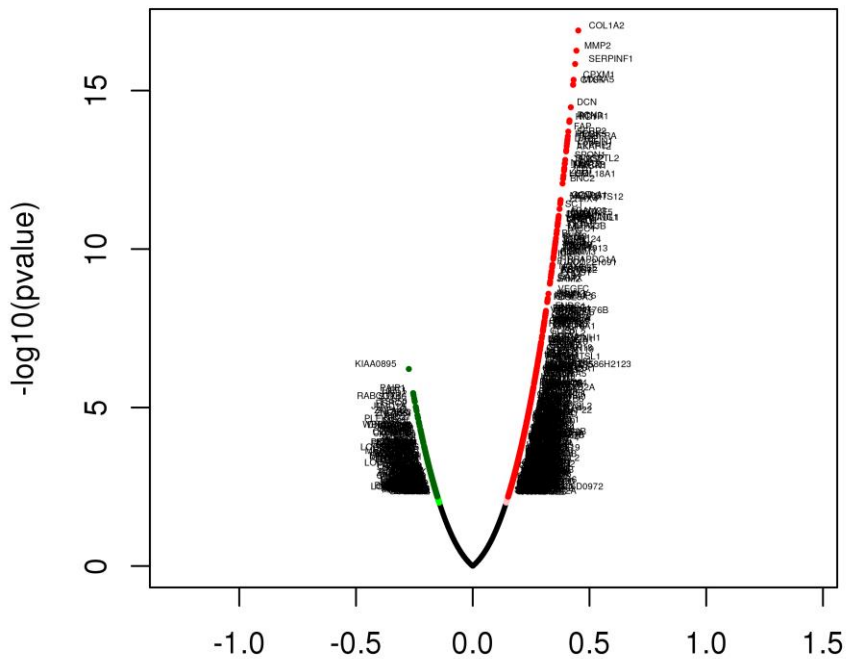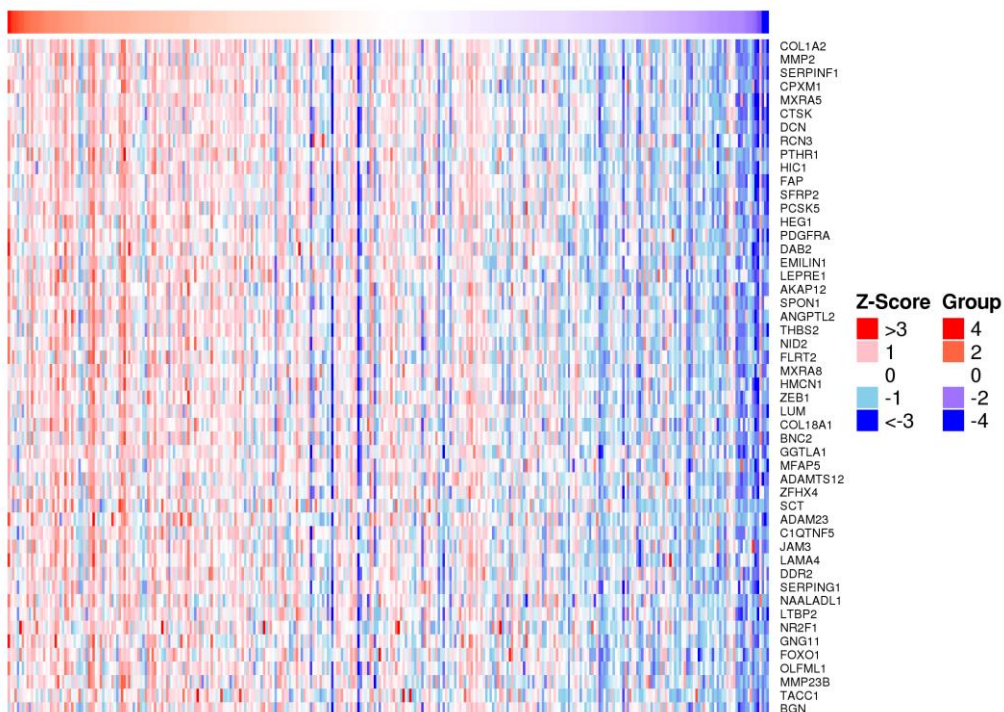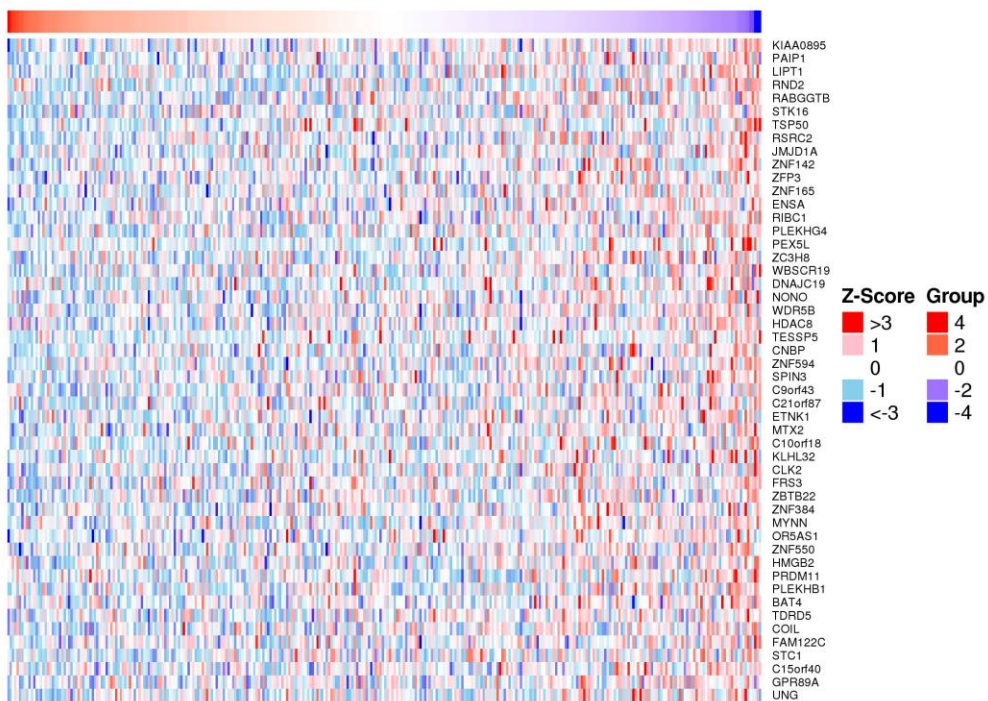

# hsa-mir-654 Association Result

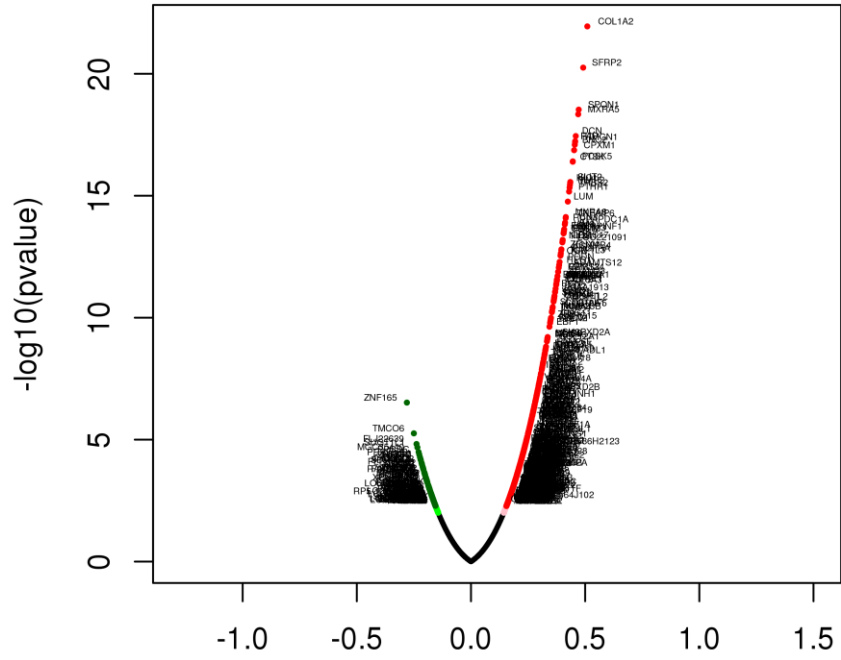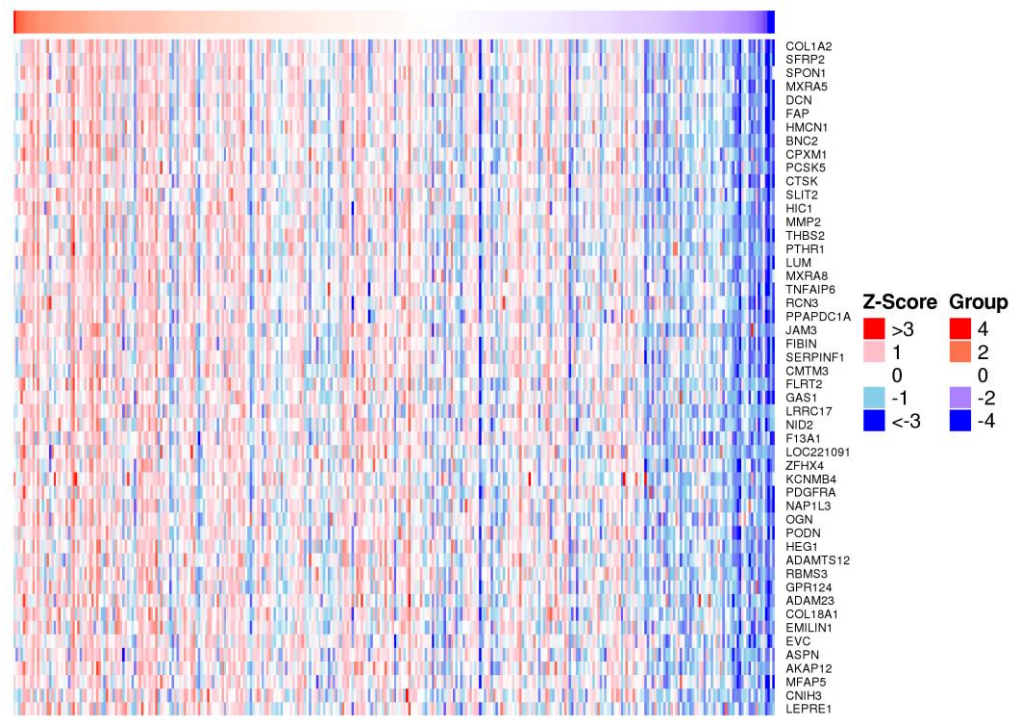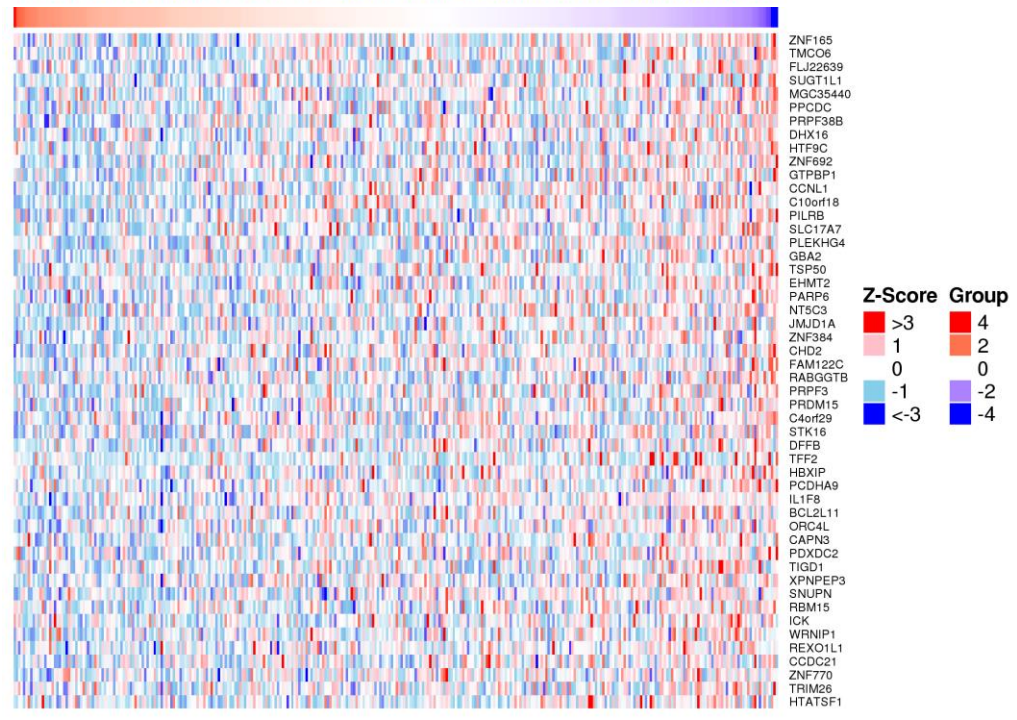

Supplement: d0mo00171f1.pdf [file d0mo00171f1.pdf]
